# Supplementary material for: Hydrogen sensing based on nanoporous silica-embedded ultra dense ZnO nanobundles
Source: Royal Society of Chemistry journal article supplement (doi:10.1039/c3ra45316b), 2014-01-01
Supplement: c3ra45316b.pdf [file c3ra45316b.pdf]

## Nanoseed size estimation from the data obtained from UV-Visible spectrophotometer

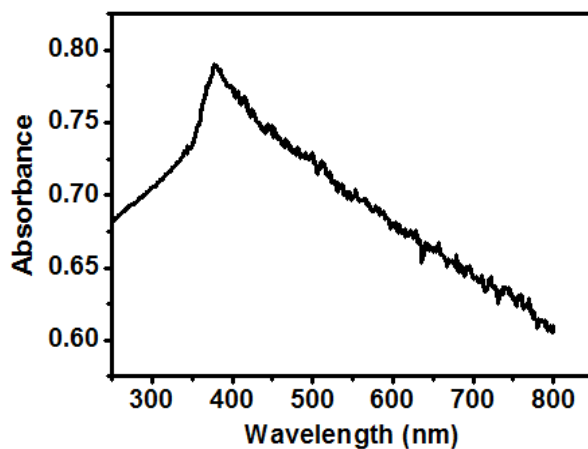

Figure S3 shows the characterization of ZnO seeds by UV-Visible spectroscopy

The particle size can be estimated from the experimental UV-Vis absorption spectrum using the following expression derived from the effective mass model:

$$E_g^* = E_g^{bulk} + \frac{\hbar^2 \pi^2}{2r^2} \left( \frac{1}{m_e^*} + \frac{1}{m_h^*} \right) - \frac{1.8e^2}{4\pi\epsilon\epsilon_0 r} - \frac{0.124e^4}{\hbar^2 (4\pi\epsilon\epsilon_0)^2} \left( \frac{1}{m_e^*} + \frac{1}{m_h^*} \right)^{-1} \quad ..(1)$$

$E_g^*$  = band gap energy of the nanoparticle, which will be determined from the UV-Visible absorbance spectrum

$E_g^{Bulk}$  = band gap energy of the bulk ZnO (at room temperature), which has the value of  $5.392 \times 10^{-19}$  J

$h$  = Planck's Constant,  $6.625 \times 10^{-34}$  J·s

$r$  = particle radius (m)

$m_e$  = mass of a free electron,  $9.11 \times 10^{-31}$  kg

$m_e^*$  = 0.29  $m_e$  (effective mass of a conduction band electron in ZnO)

$m_h^*$  = 1.21  $m_e$  (effective mass of a valence band hole in ZnO)

$e$  = elementary charge,  $1.602 \times 10^{-19}$  C

$$\varepsilon_0 = 8.854 \times 10^{-12} \text{ C}^2 \text{ N}^{-1} \text{ m}^{-2} \text{ (permittivity of free space)}$$

$$\varepsilon = 5.7 \text{ (relative permittivity of ZnO)}$$

On putting these values in above equations ,

Using UV- Visible spectra, the cut-off wavelength was determined as  $\lambda_c = 379 \text{ nm}$ .

From this value, the band gap of the ZnO was calculated as:

$$E_g^* = \frac{(6.626 \times 10^{-34} \text{ Js})(3 \times 10^8 \text{ m/s})}{379 \times 10^{-9} \text{ m}} = 5.24 \times 10^{-19} \text{ J} = 3.27 \text{ eV}$$

Finally, using the band gap, and other known constants, the particle size can be determined from the effective-mass model.

$$E_g^* = E_g^{bulk} + \frac{\hbar^2 \pi^2}{2r^2} \left( \frac{1}{m_e^*} + \frac{1}{m_h^*} \right) - \frac{1.8e^2}{4\pi\varepsilon\varepsilon_0 r} - \frac{0.124e^4}{\hbar^2 (4\pi\varepsilon\varepsilon_0)^2} \left( \frac{1}{m_e^*} + \frac{1}{m_h^*} \right)^{-1}$$

where the values of all constants are defined in [1]. This equation can be rearranged to give a quadratic equation as a function of the radius,

$$E_g^* r^2 = E_g^{bulk} r^2 + \frac{\hbar^2 \pi^2}{2} \left( \frac{1}{m_e^*} + \frac{1}{m_h^*} \right) - \frac{1.8e^2 r}{4\pi\epsilon\epsilon_0} - \frac{0.124e^4}{\hbar^2 (4\pi\epsilon\epsilon_0)^2} \left( \frac{1}{m_e^*} + \frac{1}{m_h^*} \right)^{-1} r^2$$

$$\left[ E_g^* - E_g^{bulk} + \frac{0.124e^4}{\hbar^2 (4\pi\epsilon\epsilon_0)^2} \left( \frac{1}{m_e^*} + \frac{1}{m_h^*} \right)^{-1} \right] r^2 + \left[ \frac{1.8e^2}{4\pi\epsilon\epsilon_0} \right] r - \frac{\hbar^2 \pi^2}{2} \left( \frac{1}{m_e^*} + \frac{1}{m_h^*} \right) = 0$$

$$ar^2 + br + c = 0$$

$$r = \frac{-b \pm \sqrt{b^2 - 4ac}}{2a}$$

where

$$a = \left[ E_g^* - E_g^{bulk} + \frac{0.124e^4}{\hbar^2 (4\pi\epsilon\epsilon_0)^2} \left( \frac{1}{m_e^*} + \frac{1}{m_h^*} \right)^{-1} \right]$$

$$a = 5.232 \times 10^{-19} J - 5.392 \times 10^{-19} J + \frac{0.124(1.602 \times 10^{-19} C)^4}{(6.626 \times 10^{-34} Js / 2\pi)^2 (4\pi(5.7)(8.854 \times 10^{-12} C^2 / Nm^2))^2} \bullet$$

$$\left( \frac{1}{0.29(9.11 \times 10^{-31} kg)} + \frac{1}{1.21(9.11 \times 10^{-31} kg)} \right)^{-1}$$

$$a = 2.4147 \times 10^{-20} J$$

$$b = \left[ \frac{1.8e^2}{4\pi\epsilon\epsilon_0} \right] = \frac{1.8(1.602 \times 10^{-19} C)^2}{4\pi(5.7)(8.854 \times 10^{-12} C^2 / Nm^2)}$$

$$b = 7.284 \times 10^{-29} Jm$$

$$c = -\frac{\hbar^2 \pi^2}{2} \left( \frac{1}{m_e^*} + \frac{1}{m_h^*} \right) = \frac{-(6.626 \times 10^{-34} Js / 2\pi)^2 \pi^2}{2} \bullet \left( \frac{1}{0.29(9.11 \times 10^{-31} kg)} + \frac{1}{1.21(9.11 \times 10^{-31} kg)} \right)$$

$$c = -2.5747 \times 10^{-37} Jm^2$$

$$r = \frac{-7.284 \times 10^{-29} Jm \pm \sqrt{(7.284 \times 10^{-29} Jm)^2 - 4(2.4147 \times 10^{-20} J)(-2.5747 \times 10^{-37} Jm^2)}}{2(2.4147 \times 10^{-20} J)}$$

$$r = 4.8nm$$

$$2r = 9.6nm$$

So, the nanoseeds have a particle size of around 9.6 nm, with a band gap of 3.27 eV.
